# Supplementary material for: Patterns of Cell Division, Cell Differentiation and Cell Elongation in Epidermis and Cortex of Arabidopsis pedicels in the Wild Type and in erecta
Source: PubMed Central journal article supplement (PMC3457992; doi:10.1371/journal.pone.0046262), 2012-09-25
Supplement: pone.0046262.s001.pdf [file pone.0046262.s001.pdf]

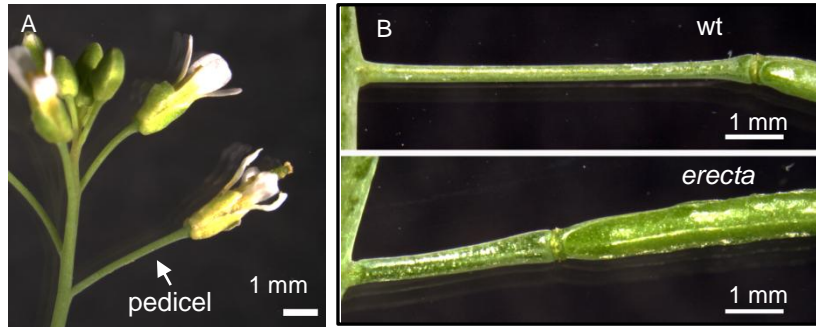

**Figure S1. Pedicels in *Arabidopsis***

- A. A pedicel is a structure connecting a flower to a stem.
- B. At maturity a pedicel is significantly shorter and broader in *er* compared to the wild type.
