# Supplementary material for: Patterns of Cell Division, Cell Differentiation and Cell Elongation in Epidermis and Cortex of Arabidopsis pedicels in the Wild Type and in erecta
Source: PubMed Central journal article supplement (PMC3457992; doi:10.1371/journal.pone.0046262), 2012-09-25
Supplement: pone.0046262.s002.pdf [file pone.0046262.s002.pdf]

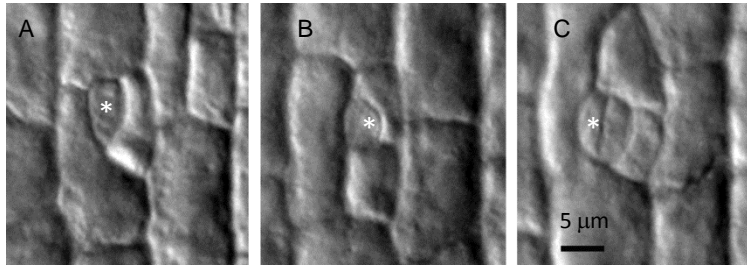

**Figure S2. An identity of a meristemoid (A), a GMC (B), and a stoma (C) can be determined in the epidermis of pedicels based on their shape.**
