# Supplementary material for: Patterns of Cell Division, Cell Differentiation and Cell Elongation in Epidermis and Cortex of Arabidopsis pedicels in the Wild Type and in erecta
Source: PubMed Central journal article supplement (PMC3457992; doi:10.1371/journal.pone.0046262), 2012-09-25
Supplement: pone.0046262.s005.pdf [file pone.0046262.s005.pdf]

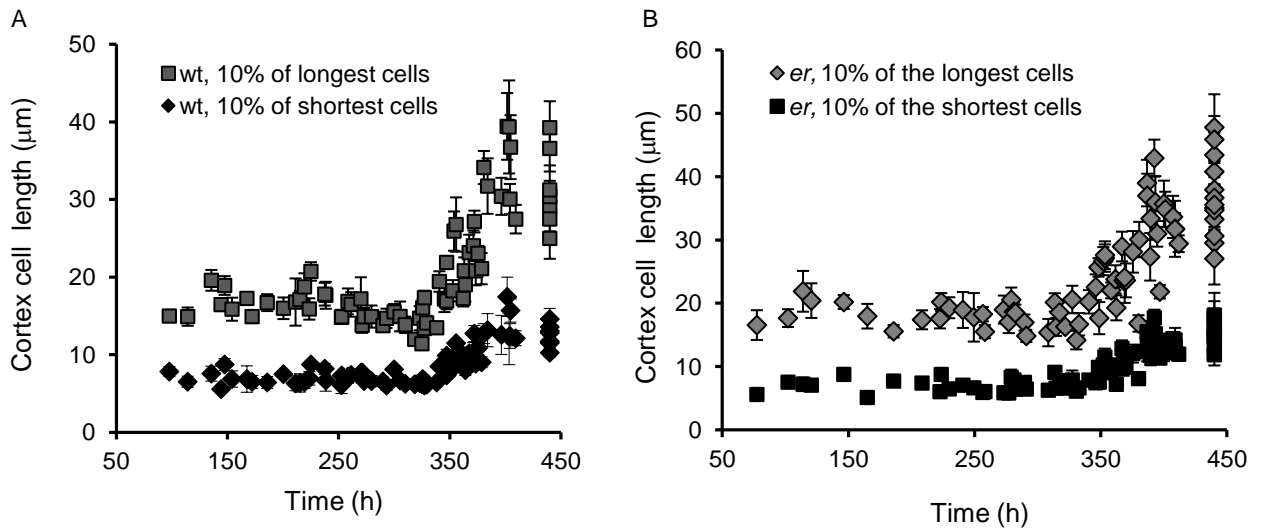

**Figure S5. The average size of 10% of the shortest and 10% of the longest cortex cells in the wild type (A) and in *er* (B) over time.** Every data point represents an average cell size in an individual pedicel.  $N=35-125$ . Error bars are added to all data points and they are  $\pm$  SD. The pedicel age (h) was determined based on pedicel length as described in the text.
