# Supplementary material for: Patterns of Cell Division, Cell Differentiation and Cell Elongation in Epidermis and Cortex of Arabidopsis pedicels in the Wild Type and in erecta
Source: PubMed Central journal article supplement (PMC3457992; doi:10.1371/journal.pone.0046262), 2012-09-25
Supplement: pone.0046262.s006.pdf [file pone.0046262.s006.pdf]

Table S1. The approximate number of cells in the longitudinal row of epidermis and cortex in the wild type and *er* at an indicated pedicel age (h) as estimated based in pedicel length and the average cell size. For epidermis number of cells corresponds to pavement cells only.

|         | wt        | <i>er</i> | wt     | <i>er</i> |
|---------|-----------|-----------|--------|-----------|
| age (h) | epidermis | epidermis | cortex | cortex    |
| 190     | 34        | 21        | 36     | 20        |
| 240     | 67        | 25        | 74     | 35        |
| 300     | 75        | 30        | 180    | 69        |
| 340     | 74        | 33        | 320    | 90        |
