# Supplementary material for: Patterns of Cell Division, Cell Differentiation and Cell Elongation in Epidermis and Cortex of Arabidopsis pedicels in the Wild Type and in erecta
Source: PubMed Central journal article supplement (PMC3457992; doi:10.1371/journal.pone.0046262), 2012-09-25
Supplement: pone.0046262.s007.pdf [file pone.0046262.s007.pdf]

Table S2. Average length (mm) of epidermal and cortex cells at different time periods of pedicel growth in the wild type and *er*. Uncertainties are  $\pm$  SE. The calculations of average epidermal cell length do not take into account length of meristemoids, guard mother cells and stomata.

|         | wt             | <i>er</i>      | wt             | <i>er</i>      |
|---------|----------------|----------------|----------------|----------------|
| age (h) | epidermis      | epidermis      | cortex         | cortex         |
| 100-190 | 12.2 $\pm$ 0.5 | 11.9 $\pm$ 0.2 | 11.4 $\pm$ 0.4 | 12.2 $\pm$ 0.4 |
| 190-240 | 13.2 $\pm$ 0.4 | 15.1 $\pm$ 0.9 | 11.7 $\pm$ 0.4 | 11.9 $\pm$ 0.4 |
| 240-300 | 18.4 $\pm$ 0.8 | 21.1 $\pm$ 0.8 | 10.6 $\pm$ 0.2 | 11.4 $\pm$ 0.3 |
| 300-340 | 35.4 $\pm$ 1.7 | 31.1 $\pm$ 2.9 | 9.7 $\pm$ 0.2  | 11.7 $\pm$ 0.5 |
| 340-400 | 59.8 $\pm$ 4.2 | 51.8 $\pm$ 2.1 | 15.9 $\pm$ 0.8 | 18.6 $\pm$ 0.8 |
| >440    | 94.3 $\pm$ 4.2 | 60.5 $\pm$ 2.7 | 20.7 $\pm$ 1.2 | 24.8 $\pm$ 1.1 |
